# Supplementary material for: All-inorganic lead-free double perovskite Cs2NalnCl6 for fiber-based optical temperature sensing for temperature and safety monitoring
Source: Royal Society of Chemistry journal article supplement (doi:10.1039/d4tc04375h), 2024-12-18
Supplement: d4tc04375h1.pdf [file d4tc04375h1.pdf]

# **All-inorganic lead-free double perovskite Cs<sub>2</sub>NaInCl<sub>6</sub> for fiber-based optical temperature sensing for temperature and safety monitoring**

Xiao Wang<sup>[a]</sup>, Yanyan Li<sup>\*,[a]</sup>, Haitao Tang<sup>[b]</sup>, Ruiming Li<sup>[c]</sup>, Xiaodi Hao<sup>[a]</sup>, Meng Li<sup>[a]</sup>, Jiale Zhao<sup>[a]</sup>,  
Liyan Yang<sup>[a]</sup>, Yu Chen<sup>[a]</sup>, Qianqian Lin<sup>\*,[b]</sup>, Mufang Li<sup>[a]</sup>, Dong Wang<sup>\*,[a]</sup>

[a] Key Laboratory of Textile Fiber and Products, Wuhan Textile University, Ministry of Education,  
Wuhan 430200, China

[b] School of Physics and Technology, Wuhan University, Wuhan 430200, China

[c] Hubei Key Laboratory of Photoelectric Conversion Materials and Devices, Hubei Engineering  
Research Center of Micro and Nano Optoelectronic devices and integration, School of Physics and  
Electronic Science, Hubei Normal University, Huangshi 435002, China.

**Keywords:** Optical temperature sensing, Fiber-based, Double halide perovskites, Cs<sub>2</sub>NaInCl<sub>6</sub>, Tunable dual emission

## Supporting Figures

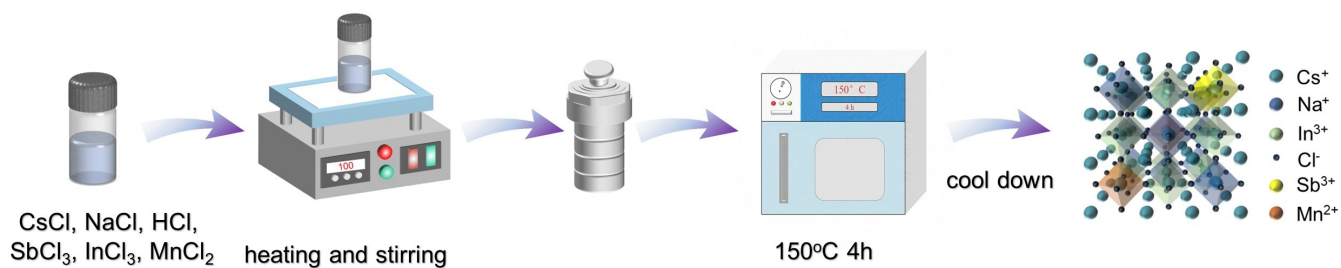

**Fig. S1.** Schematic illustration of the synthesis process of  $\text{Cs}_2\text{NaInCl}_6\text{:Sb}^{3+}\text{-Mn}^{2+}$  double perovskites using the hydrothermal method.

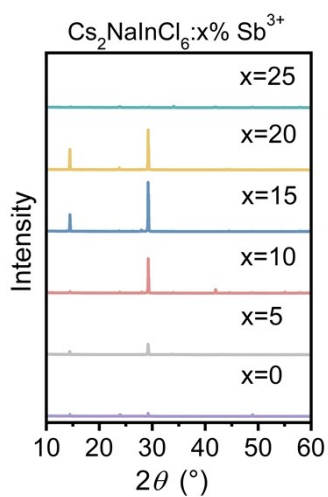

**Fig. S2.** XRD patterns of  $\text{Cs}_2\text{NaInCl}_6$  double perovskites doped with various amounts of  $\text{Sb}^{3+}$ .

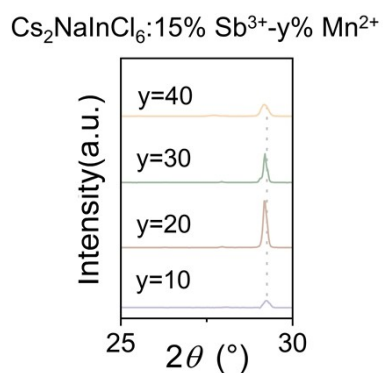

**Fig. S3.** XRD patterns of  $\text{Cs}_2\text{NaInCl}_6\text{-Sb}^{3+}$  doped with various amounts of  $\text{Mn}^{2+}$ , showing enlarged characteristic peaks at  $29.3^\circ$ .

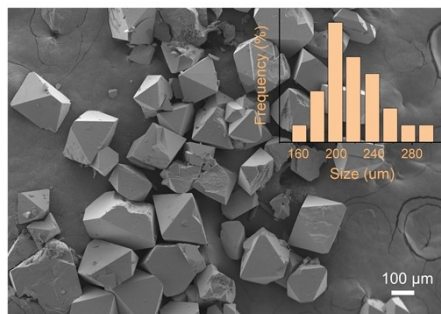

**Fig. S4.** SEM image of  $\text{Cs}_2\text{NaInCl}_6\text{:Sb}^{3+}\text{-Mn}^{2+}$ , with the inset showing the particle size distribution.

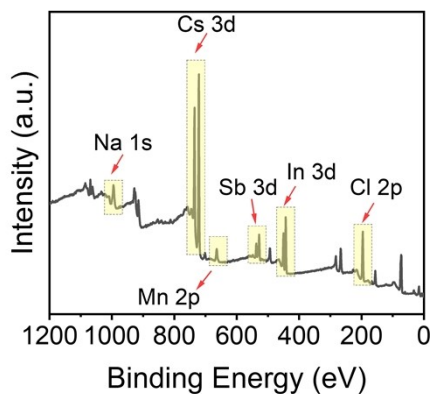

**Fig. S5.** XPS of 15%  $\text{Sb}^{3+}$ -20%  $\text{Mn}^{2+}$  co-doped  $\text{Cs}_2\text{NaInCl}_6$ :

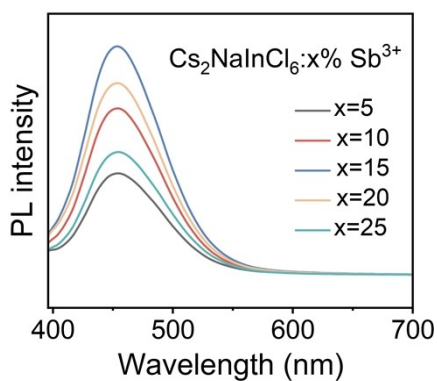

**Fig. S6.** PL spectra of  $\text{Cs}_2\text{NaInCl}_6\text{:x}\% \text{Sb}^{3+}$ .

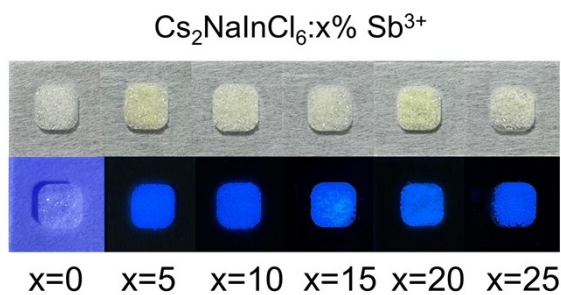

**Fig. S7.** Photographs of  $\text{Cs}_2\text{NaInCl}_6\text{:x}\% \text{Sb}^{3+}$  under visible light (top) and a 365 nm UV lamp (bottom) show that the luminous intensity is strongest when  $x=15\%$ .

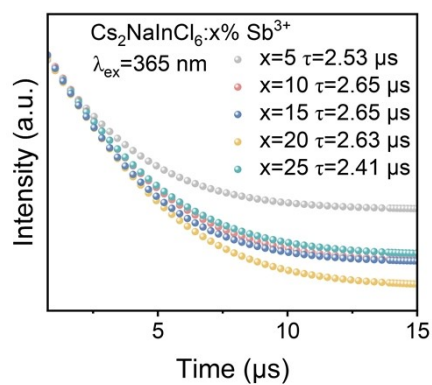

**Fig. S8.** Decay curves of  $\text{Cs}_2\text{NaInCl}_6:x\% \text{Sb}^{3+}$ .

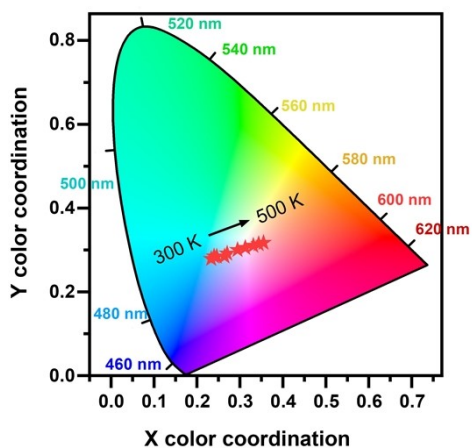

**Fig. S9.** Corresponding 1931 CIE emission color coordinates of emission spectra.

PLA- $\text{Cs}_2\text{NaInCl}_6:\text{Sb}^{3+}-\text{Mn}^{2+}$  nanofiber membrane

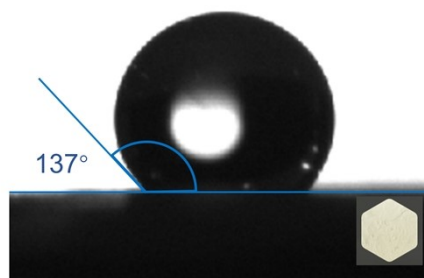

**Fig. S10.** Contact angle of PLA- $\text{Cs}_2\text{NaInCl}_6:\text{Sb}^{3+}-\text{Mn}^{2+}$  nanofiber membrane.
